# Supplementary material
Source: PubMed Central journal article supplement (PMC8324044)
Supplement: NIHMS1725545-supplement-Supplemental_Material.pdf [file NIHMS1725545-supplement-Supplemental_Material.pdf]

Table S1.

*Lagged Spillover effects and crossover effects of daily stressors*

| 1. Spillover effects between T1D participants' GS and their DS     |               |          |                                              |                 |          |
|--------------------------------------------------------------------|---------------|----------|----------------------------------------------|-----------------|----------|
| T1D participants' GS-> T1D participants' DS                        | <i>b (SE)</i> | <i>t</i> | T1D participants' DS -> T1D participants' GS | <i>b (SE)</i>   | <i>t</i> |
| Intercept                                                          | .24(.02)      | 14.65*** | Intercept                                    | .13(.01)        | 10.86*** |
| Day                                                                | -.001(.001)   | -1.59    | Day                                          | -.004(.001)     | -3.69*** |
| Previous day's Outcome                                             | .15(.02)      | 7.70***  | Previous day's Outcome                       | .10(.02)        | 5.07***  |
| T1D participants' GS <sub>wp</sub>                                 | -.04(.02)     | -1.79    | T1D participants' DS <sub>wp</sub>           | .01(.02)        | .38      |
| T1D participants' GS <sub>bp</sub>                                 | .63(.07)      | 8.88***  | T1D participants' DS <sub>bp</sub>           | .38(.04)        | 9.35***  |
| Length of Diagnosis <sub>bp</sub>                                  | -.001(.001)   | -2.10*   | Length of Diagnosis <sub>bp</sub>            | -.000001(.0004) | .02      |
| 2. Crossover effects between T1D participants' GS and partners' GS |               |          |                                              |                 |          |
| T1D participants' GS-> Partners' GS                                | <i>b (SE)</i> | <i>t</i> | Partners' GS -> T1D participants' GS         | <i>b (SE)</i>   | <i>t</i> |
| Intercept                                                          | .15(.02)      | 8.28***  | Intercept                                    | .22(.02)        | 12.69*** |
| Day                                                                | -.01(.001)    | -4.64*** | Day                                          | -.001(.001)     | -.45     |
| Previous day's Outcome                                             | -.01(.03)     | -.23     | Previous day's Outcome                       | .16(.03)        | 5.71***  |
| T1D participants' GS <sub>wp</sub>                                 | .01(.03)      | .24      | Partners' GS <sub>wp</sub>                   | -.05(.03)       | -1.66    |
| T1D participants' GS <sub>bp</sub>                                 | -.001(.08)    | -.01     | Partners' GS <sub>bp</sub>                   | .13(.08)        | 1.57     |
| Spouse as a source of stress <sub>wp</sub>                         | .09(.02)      | 5.51***  | Spouse as a source of stress <sub>wp</sub>   | .12(.02)        | 7.39***  |
| Length of Diagnosis <sub>bp</sub>                                  | .0004(.001)   | .71      | Length of Diagnosis <sub>bp</sub>            | -.001(.001)     | -1.64    |
| 3. Crossover effects between T1D participants' DS and partners' GS |               |          |                                              |                 |          |
| T1D participants' DS-> Partners' GS                                | <i>b (SE)</i> | <i>t</i> | Partners' GS-> T1D participants' DS          | <i>b (SE)</i>   | <i>t</i> |
| Intercept                                                          | .13(.01)      | 8.58***  | Intercept                                    | .26(.02)        | 13.31*** |
| Day                                                                | -.01(.001)    | -6.40*** | Day                                          | -.001(.001)     | -1.56    |
| Previous day's Outcome                                             | .01(.02)      | .42      | Previous day's Outcome                       | .15(.02)        | 7.47***  |
| T1D participants' DS <sub>wp</sub>                                 | .01(.02)      | .28      | Partners' GS <sub>wp</sub>                   | -.04(.02)       | -2.00*   |
| T1D participants' DS <sub>bp</sub>                                 | .10(.05)      | 2.05*    | Partners' GS <sub>bp</sub>                   | .18(.09)        | .198     |
| Length of Diagnosis <sub>bp</sub>                                  | .001(.0005)   | 1.53     | Length of Diagnosis <sub>bp</sub>            | -.002(.001)     | -2.72**  |

Note. *wp* = within-person. *bp* = between-person. *DS*= diabetes-specific stressors. *GS*= general stressors. Table reports unstandardized coefficients (*b*) with standard errors (*SE*) in parentheses.

\*  $p < .05$ , \*\*  $p < .01$ , \*\*\*  $p < .001$

Table S2.

*Lagged sleep satisfaction and relationship satisfaction as moderators for spillover and crossover effects of daily stressors*

| 1. Sleep satisfaction and relationship satisfaction as moderators for spillover effects between T1D participants' GS and their DS     |               |          |                                                                                                   |               |          |
|---------------------------------------------------------------------------------------------------------------------------------------|---------------|----------|---------------------------------------------------------------------------------------------------|---------------|----------|
| T1D participants' GS-><br>T1D participants' DS                                                                                        | <i>b (SE)</i> | <i>t</i> | T1D participants' DS -><br>T1D participants' GS                                                   | <i>b (SE)</i> | <i>t</i> |
| Intercept                                                                                                                             | .24(.02)      | 14.46*** | Intercept                                                                                         | .14(.01)      | 11.10*** |
| Day                                                                                                                                   | -.002(.001)   | -1.57    | Day                                                                                               | -.004(.001)   | -3.72*** |
| Previous day's Outcome                                                                                                                | .15(.02)      | 7.74***  | Previous day's Outcome                                                                            | .10(.02)      | 4.90***  |
| T1D participants' GS <sub>wp</sub>                                                                                                    | -.04(.02)     | -1.79    | T1D participants' DS <sub>wp</sub>                                                                | .01(.02)      | .29      |
| T1D participants' GS <sub>wp</sub> x T1D<br>participants' sleep satisfaction <sub>bp</sub>                                            | .02(.04)      | .58      | T1D participants' DS <sub>wp</sub> x T1D<br>participants' sleep satisfaction <sub>bp</sub>        | -.05(.04)     | -1.45    |
| T1D participants' GS <sub>wp</sub> x T1D<br>participants' relationship satisfaction <sub>bp</sub>                                     | -.002(.001)   | -1.11    | T1D participants' DS <sub>wp</sub> x T1D<br>participants' relationship satisfaction <sub>bp</sub> | .001(.002)    | .59      |
| T1D participants' GS <sub>bp</sub>                                                                                                    | .63(.07)      | 8.62***  | T1D participants' DS <sub>bp</sub>                                                                | .37(.04)      | 8.98***  |
| T1D participants' sleep satisfaction <sub>bp</sub>                                                                                    | -.02(.01)     | -1.42    | T1D participants' sleep satisfaction <sub>bp</sub>                                                | -.01(.01)     | -.94     |
| T1D participants' relationship<br>satisfaction <sub>bp</sub>                                                                          | .0005(.001)   | .99      | T1D participants' relationship<br>satisfaction <sub>bp</sub>                                      | -.001(.0004)  | -2.22*   |
| Length of Diagnosis <sub>bp</sub>                                                                                                     | -.001(.001)   | -1.86    | Length of Diagnosis <sub>bp</sub>                                                                 | -.0001(.0004) | -.17     |
| 2. Sleep satisfaction and relationship satisfaction as moderators for crossover effects between T1D participants' GS and partners' GS |               |          |                                                                                                   |               |          |
| T1D participants' GS-><br>Partners' GS                                                                                                | <i>b (SE)</i> | <i>t</i> | Partners' GS -><br>Persons with T1D' GS                                                           | <i>b (SE)</i> | <i>t</i> |
| Intercept                                                                                                                             | .15(.02)      | 8.71***  | Intercept                                                                                         | .22(.02)      | 12.66*** |
| Day                                                                                                                                   | -.01(.001)    | -4.61*** | Day                                                                                               | -.001(.001)   | -.46     |
| Previous day's Outcome                                                                                                                | -.01(.03)     | -.37     | Previous day's Outcome                                                                            | .16(.03)      | 5.61***  |
| T1D participants' GS <sub>wp</sub>                                                                                                    | .01(.03)      | .28      | Partners' GS <sub>wp</sub>                                                                        | -.05(.03)     | -1.68    |
| Spouse as a source of stress <sub>wp</sub>                                                                                            | .09(.02)      | 5.24***  | Spouse as a source of stress <sub>wp</sub>                                                        | .12(.02)      | 7.28***  |
| Length of Diagnosis <sub>bp</sub>                                                                                                     | .0002(.001)   | .41      | Length of Diagnosis <sub>bp</sub>                                                                 | -.001(.001)   | -1.67    |
| T1D participants' GS <sub>wp</sub> x Partners'<br>sleep satisfaction <sub>bp</sub>                                                    | .01(.05)      | .32      | Partners' GS <sub>wp</sub> x T1D participants'<br>sleep satisfaction <sub>bp</sub>                | -.05(.06)     | -.77     |
| T1D participants' GS <sub>wp</sub> x Partners'<br>relationship satisfaction <sub>bp</sub>                                             | .0001(.002)   | .07      | Partners' GS <sub>wp</sub> x T1D participants'<br>relationship satisfaction <sub>bp</sub>         | .02(.002)     | .86      |

|                                                                                                                                       |               |          |                                                                                        |               |          |
|---------------------------------------------------------------------------------------------------------------------------------------|---------------|----------|----------------------------------------------------------------------------------------|---------------|----------|
| T1D participants' GS <sub>bp</sub>                                                                                                    | -.02(.07)     | -.29     | Partners' GS <sub>bp</sub>                                                             | .10(.08)      | 1.24     |
| Partners' sleep satisfaction <sub>bp</sub>                                                                                            | -.02(.01)     | -1.53    | T1D participants' sleep satisfaction <sub>bp</sub>                                     | -.01(.01)     | -.94     |
| Partners' relationship satisfaction <sub>bp</sub>                                                                                     | -.001(.001)   | -2.29*   | T1D participants' relationship satisfaction <sub>bp</sub>                              | -.001(.001)   | -1.22    |
| 3. Sleep Satisfaction and relationship satisfaction as moderators for crossover effects between T1D participants' DS and partners' GS |               |          |                                                                                        |               |          |
| T1D participants' DS-> Partners' GS                                                                                                   | <i>b (SE)</i> | <i>t</i> | Partners' GS-> T1D participants' DS                                                    | <i>b (SE)</i> | <i>t</i> |
| Intercept                                                                                                                             | .13(.01)      | 9.14***  | Intercept                                                                              | .25(.02)      | 13.24*** |
| Day                                                                                                                                   | -.01(.001)    | -6.42*** | Day                                                                                    | -.001(.001)   | -1.51    |
| Previous day's Outcome                                                                                                                | .01(.02)      | .34      | Previous day's Outcome                                                                 | .15(.02)      | 7.52***  |
| T1D participants' DS <sub>wp</sub>                                                                                                    | .01(.02)      | .31      | Partners' GS <sub>wp</sub>                                                             | -.04(.02)     | -2.13*   |
| T1D participants' DS <sub>wp</sub> x Partners' sleep satisfaction <sub>bp</sub>                                                       | .02(.04)      | .66      | Partners' GS <sub>wp</sub> x T1D participants' sleep satisfaction <sub>bp</sub>        | .02(.04)      | .64      |
| T1D participants' DS <sub>wp</sub> x Partners' relationship satisfaction <sub>bp</sub>                                                | -.001(.002)   | -.60     | Partners' GS <sub>wp</sub> x T1D participants' relationship satisfaction <sub>bp</sub> | -.002(.001)   | -1.75    |
| T1D participants' DS <sub>bp</sub>                                                                                                    | .08(.05)      | 1.82     | Partners' GS <sub>bp</sub>                                                             | .15(.09)      | 1.72     |
| Partners' sleep satisfaction <sub>bp</sub>                                                                                            | -.03(.01)     | -2.72**  | T1D participants' sleep satisfaction <sub>bp</sub>                                     | -.03(.01)     | -2.06*   |
| Partners' relationship satisfaction <sub>bp</sub>                                                                                     | -.001(.0004)  | -2.72**  | T1D participants' relationship satisfaction <sub>bp</sub>                              | -.0002(.001)  | -.35     |
| Length of Diagnosis                                                                                                                   | .001(.0005)   | 1.31     | Length of Diagnosis                                                                    | -.002(.001)   | -2.56*   |

Note. *wp* = within-person. *bp* = between-person. *DS*: diabetes-specific stressors. *GS*: general stressors. Table reports unstandardized coefficients (*b*) with standard errors (*SE*) in parentheses.

\*  $p < .05$ , \*\*  $p < .01$ , \*\*\*  $p < .001$
